# Supplementary material for: The Role of Botulinum Toxin Type-A in Spasticity: Research Trends from a Bibliometric Analysis
Source: MDPI journal article supplement (doi:10.3390/toxins16040184), 2024-04-09
Supplement: s1 [file s1]

# The Role of Botulinum Toxin Type-A in Spasticity: Research Trends from a Bibliometric Analysis

**Table S1.** Top 150 Keywords with bibliometric metrics

| Freq | Label                       | Burst | Degree | Centrality | Sigma | Year | ClusterID |
|------|-----------------------------|-------|--------|------------|-------|------|-----------|
| 599  | botulinum toxin             | 0.00  | 24     | 0.04       | 1.00  | 2000 | 2         |
| 368  | cerebral palsy              | 0.00  | 33     | 0.03       | 1.00  | 2000 | 4         |
| 280  | stroke                      | 0.00  | 28     | 0.04       | 1.00  | 2000 | 2         |
| 270  | management                  | 16.09 | 32     | 0.02       | 1.47  | 2000 | 4         |
| 264  | spasticity                  | 0.00  | 33     | 0.04       | 1.00  | 2000 | 4         |
| 259  | double blind                | 18.53 | 31     | 0.02       | 1.33  | 2000 | 1         |
| 218  | children                    | 0.00  | 40     | 0.06       | 1.00  | 2000 | 4         |
| 217  | upper limb spasticity       | 0.00  | 51     | 0.07       | 1.00  | 2000 | 2         |
| 207  | toxin type a                | 0.00  | 41     | 0.06       | 1.00  | 2003 | 1         |
| 196  | reliability                 | 0.00  | 32     | 0.03       | 1.00  | 2000 | 3         |
| 192  | efficacy                    | 0.00  | 31     | 0.03       | 1.00  | 2001 | 1         |
| 191  | muscle spasticity           | 0.00  | 36     | 0.04       | 1.00  | 2000 | 3         |
| 187  | botulinum toxin a           | 0.00  | 34     | 0.06       | 1.00  | 2000 | 2         |
| 147  | injection                   | 0.00  | 29     | 0.06       | 1.00  | 2001 | 2         |
| 129  | safety                      | 0.00  | 31     | 0.03       | 1.00  | 2003 | 1         |
| 115  | muscle                      | 3.19  | 44     | 0.06       | 1.19  | 2000 | 4         |
| 114  | botulinum toxin type a      | 5.11  | 45     | 0.07       | 1.38  | 2000 | 1         |
| 114  | placebo controlled trial    | 9.35  | 41     | 0.05       | 1.64  | 2000 | 2         |
| 108  | injections                  | 7.59  | 35     | 0.03       | 1.26  | 2000 | 4         |
| 97   | therapy                     | 0.00  | 33     | 0.03       | 1.00  | 2004 | 4         |
| 93   | neurotoxin                  | 0.00  | 31     | 0.03       | 1.00  | 2000 | 1         |
| 89   | botulinum toxins            | 0.00  | 27     | 0.03       | 1.00  | 2000 | 2         |
| 88   | cerebral-palsy              | 0.00  | 54     | 0.12       | 1.00  | 2000 | 0         |
| 85   | upper extremity             | 3.71  | 39     | 0.05       | 1.22  | 2006 | 3         |
| 84   | rehabilitation              | 3.63  | 26     | 0.03       | 1.11  | 2006 | 3         |
| 80   | upper limb                  | 0.00  | 46     | 0.07       | 1.00  | 2000 | 3         |
| 80   | gait                        | 0.00  | 38     | 0.04       | 1.00  | 2004 | 4         |
| 71   | quality of life             | 0.00  | 43     | 0.08       | 1.00  | 2004 | 2         |
| 70   | trial                       | 10.23 | 40     | 0.06       | 1.61  | 2000 | 3         |
| 69   | randomized controlled trial | 5.56  | 26     | 0.04       | 1.22  | 2003 | 0         |
| 68   | modified ashworth scale     | 0.00  | 26     | 0.03       | 1.00  | 2003 | 3         |
| 68   | poststroke spasticity       | 6.43  | 26     | 0.02       | 1.12  | 2008 | 3         |
| 67   | adults                      | 6.80  | 28     | 0.03       | 1.22  | 2003 | 4         |
| 62   | gross motor function        | 0.00  | 32     | 0.05       | 1.00  | 2003 | 4         |
| 60   | scale                       | 0.00  | 27     | 0.02       | 1.00  | 2007 | 0         |
| 59   | stroke patients             | 3.85  | 38     | 0.04       | 1.16  | 2002 | 0         |
| 57   | limb spasticity             | 5.03  | 26     | 0.02       | 1.13  | 2000 | 1         |
| 55   | lower limb spasticity       | 0.00  | 32     | 0.04       | 1.00  | 2009 | 0         |

|    |                            |       |    |      |      |      |   |
|----|----------------------------|-------|----|------|------|------|---|
| 53 | placebo                    | 5.85  | 33 | 0.04 | 1.24 | 2002 | 3 |
| 52 | foot                       | 7.00  | 37 | 0.07 | 1.57 | 2001 | 2 |
| 51 | recovery                   | 0.00  | 34 | 0.03 | 1.00 | 2003 | 3 |
| 45 | ashworth scale             | 0.00  | 34 | 0.04 | 1.00 | 2005 | 3 |
| 42 | prevalence                 | 7.08  | 11 | 0.00 | 1.03 | 2008 | 4 |
| 40 | multiple sclerosis         | 0.00  | 30 | 0.04 | 1.00 | 2006 | 6 |
| 40 | botulinum neurotoxin       | 5.21  | 27 | 0.04 | 1.20 | 2007 | 1 |
| 39 | equinus                    | 0.00  | 29 | 0.03 | 1.00 | 2002 | 4 |
| 39 | intervention               | 3.23  | 24 | 0.02 | 1.07 | 2011 | 4 |
| 39 | a toxin                    | 15.13 | 21 | 0.01 | 1.21 | 2000 | 4 |
| 37 | disability                 | 0.00  | 28 | 0.03 | 1.00 | 2003 | 3 |
| 35 | electrical stimulation     | 0.00  | 45 | 0.06 | 1.00 | 2006 | 5 |
| 35 | controlled trial           | 5.33  | 31 | 0.06 | 1.34 | 2000 | 0 |
| 35 | interrater reliability     | 0.00  | 26 | 0.02 | 1.00 | 2010 | 0 |
| 35 | manual needle placement    | 4.87  | 23 | 0.01 | 1.07 | 2012 | 0 |
| 35 | botulinum-toxin            | 4.22  | 22 | 0.02 | 1.09 | 2003 | 6 |
| 34 | lower limb                 | 3.81  | 39 | 0.04 | 1.14 | 2004 | 4 |
| 34 | pain                       | 0.00  | 30 | 0.04 | 1.00 | 2006 | 3 |
| 33 | upper extremity spasticity | 12.32 | 18 | 0.01 | 1.11 | 2000 | 2 |
| 33 | nt 201                     | 5.36  | 15 | 0.00 | 1.02 | 2013 | 1 |
| 30 | electrical-stimulation     | 5.36  | 30 | 0.05 | 1.27 | 2001 | 5 |
| 29 | gastrocnemius-muscle       | 7.52  | 16 | 0.01 | 1.05 | 2011 | 5 |
| 27 | impairment                 | 0.00  | 24 | 0.02 | 1.00 | 2012 | 3 |
| 27 | walking                    | 3.20  | 18 | 0.01 | 1.03 | 2005 | 4 |
| 26 | a injections               | 0.00  | 44 | 0.06 | 1.00 | 2004 | 7 |
| 26 | a injection                | 0.00  | 24 | 0.04 | 1.00 | 2004 | 7 |
| 26 | adult spasticity           | 6.05  | 17 | 0.02 | 1.10 | 2009 | 0 |
| 24 | neuromuscular blockade     | 5.88  | 32 | 0.03 | 1.18 | 2008 | 5 |
| 24 | complexing proteins        | 5.97  | 18 | 0.01 | 1.06 | 2009 | 1 |
| 23 | traumatic brain injury     | 3.82  | 16 | 0.01 | 1.05 | 2004 | 6 |
| 22 | spinal cord injury         | 4.59  | 13 | 0.01 | 1.03 | 2005 | 6 |
| 21 | controlled-trial           | 5.56  | 15 | 0.01 | 1.04 | 2011 | 0 |
| 20 | induced movement therapy   | 4.34  | 30 | 0.05 | 1.23 | 2009 | 6 |
| 20 | movement                   | 4.04  | 29 | 0.03 | 1.14 | 2010 | 0 |
| 20 | placebo-controlled trial   | 5.52  | 23 | 0.03 | 1.15 | 2000 | 6 |
| 20 | classification             | 5.19  | 16 | 0.01 | 1.07 | 2012 | 4 |
| 20 | pathophysiology            | 0.00  | 15 | 0.02 | 1.00 | 2012 | 5 |
| 19 | gastrocnemius muscle       | 3.35  | 19 | 0.02 | 1.05 | 2012 | 5 |
| 19 | onabotulinumtoxin          | 6.52  | 13 | 0.00 | 1.03 | 2014 | 1 |
| 18 | adverse events             | 0.00  | 26 | 0.02 | 1.00 | 2004 | 4 |
| 18 | hemiparetic patients       | 4.03  | 22 | 0.01 | 1.05 | 2001 | 2 |
| 18 | motor function             | 0.00  | 14 | 0.00 | 1.00 | 2010 | 4 |
| 17 | intramuscular injection    | 3.60  | 23 | 0.02 | 1.08 | 2008 | 5 |
| 17 | stimulation                | 0.00  | 20 | 0.01 | 1.00 | 2014 | 7 |
| 17 | validity                   | 3.57  | 15 | 0.01 | 1.04 | 2008 | 0 |
| 17 | shoulder pain              | 0.00  | 11 | 0.01 | 1.00 | 2009 | 3 |

|    |                                   |      |    |      |      |      |   |
|----|-----------------------------------|------|----|------|------|------|---|
| 16 | multiple-sclerosis                | 0.00 | 21 | 0.02 | 1.00 | 2002 | 6 |
| 16 | association                       | 5.45 | 14 | 0.01 | 1.05 | 2008 | 3 |
| 15 | adolescents                       | 0.00 | 16 | 0.01 | 1.00 | 2015 | 4 |
| 15 | tardieu scale                     | 0.00 | 15 | 0.01 | 1.00 | 2013 | 0 |
| 15 | muscles                           | 3.60 | 13 | 0.01 | 1.02 | 2009 | 4 |
| 15 | hemiplegic shoulder pain          | 4.24 | 13 | 0.01 | 1.06 | 2010 | 0 |
| 14 | botulinum toxin injection         | 0.00 | 32 | 0.06 | 1.00 | 2008 | 0 |
| 14 | arm                               | 0.00 | 26 | 0.02 | 1.00 | 2000 | 3 |
| 13 | double blind trial                | 5.73 | 19 | 0.04 | 1.27 | 2000 | 7 |
| 13 | muscle tone                       | 0.00 | 14 | 0.01 | 1.00 | 2006 | 0 |
| 13 | quality-of-life                   | 3.67 | 14 | 0.01 | 1.02 | 2009 | 6 |
| 13 | botulinum toxin-a                 | 0.00 | 14 | 0.01 | 1.00 | 2010 | 0 |
| 13 | guidance                          | 4.30 | 10 | 0.00 | 1.02 | 2014 | 5 |
| 13 | strength                          | 0.00 | 5  | 0.00 | 1.00 | 2007 | 5 |
| 12 | metaanalysis                      | 0.00 | 23 | 0.02 | 1.00 | 2014 | 3 |
| 12 | gait analysis                     | 0.00 | 20 | 0.02 | 1.00 | 2000 | 4 |
| 12 | accuracy                          | 4.37 | 12 | 0.00 | 1.01 | 2012 | 5 |
| 12 | goal attainment                   | 5.00 | 11 | 0.01 | 1.07 | 2018 | 3 |
| 12 | inhibition                        | 0.00 | 8  | 0.01 | 1.00 | 2005 | 0 |
| 11 | neurotoxin type a                 | 0.00 | 20 | 0.02 | 1.00 | 2006 | 1 |
| 11 | term electrical stimulation       | 3.99 | 19 | 0.01 | 1.06 | 2005 | 2 |
| 11 | ashworth                          | 0.00 | 17 | 0.02 | 1.00 | 2000 | 3 |
| 11 | equinus foot                      | 0.00 | 14 | 0.01 | 1.00 | 2012 | 5 |
| 11 | motor recovery                    | 0.00 | 11 | 0.00 | 1.00 | 2013 | 6 |
| 11 | chronic stroke                    | 0.00 | 7  | 0.00 | 1.00 | 2015 | 5 |
| 11 | upper-limb                        | 0.00 | 5  | 0.00 | 1.00 | 2010 | 5 |
| 10 | localization                      | 0.00 | 18 | 0.01 | 1.00 | 2009 | 5 |
| 10 | botox                             | 0.00 | 17 | 0.02 | 1.00 | 2003 | 1 |
| 10 | modified tardieu scale            | 0.00 | 12 | 0.00 | 1.00 | 2014 | 3 |
| 10 | international consensus statement | 4.33 | 11 | 0.00 | 1.01 | 2012 | 4 |
| 10 | impairments                       | 0.00 | 11 | 0.00 | 1.00 | 2013 | 4 |
| 10 | skeletal muscle                   | 3.43 | 11 | 0.01 | 1.02 | 2002 | 5 |
| 10 | toxin                             | 0.00 | 8  | 0.00 | 1.00 | 2016 | 4 |
| 10 | randomized controlled-trial       | 3.95 | 7  | 0.00 | 1.01 | 2009 | 6 |
| 10 | abobotulinumtoxina                | 5.44 | 3  | 0.00 | 1.00 | 2020 | 2 |
| 9  | a treatment                       | 0.00 | 19 | 0.03 | 1.00 | 2005 | 0 |
| 9  | brain-injury                      | 0.00 | 18 | 0.02 | 1.00 | 2007 | 3 |
| 9  | spastic paresis                   | 4.40 | 13 | 0.01 | 1.05 | 2018 | 0 |
| 9  | equinovarus deformity             | 0.00 | 13 | 0.00 | 1.00 | 2016 | 0 |
| 9  | hemiplegia                        | 0.00 | 12 | 0.01 | 1.00 | 2006 | 8 |
| 9  | medial gastrocnemius              | 0.00 | 12 | 0.01 | 1.00 | 2014 | 5 |
| 9  | comprehensive rehabilitation      | 0.00 | 10 | 0.00 | 1.00 | 2010 | 7 |
| 9  | american-academy                  | 3.64 | 10 | 0.01 | 1.03 | 2010 | 1 |
| 9  | injury                            | 0.00 | 10 | 0.01 | 1.00 | 2002 | 2 |
| 9  | limb                              | 4.11 | 9  | 0.00 | 1.00 | 2002 | 4 |
| 9  | systematic review                 | 0.00 | 7  | 0.00 | 1.00 | 2016 | 7 |

|   |                       |      |    |      |      |      |   |
|---|-----------------------|------|----|------|------|------|---|
| 9 | subcommittee          | 4.40 | 5  | 0.00 | 1.00 | 2018 | 1 |
| 8 | multicenter           | 0.00 | 19 | 0.01 | 1.00 | 2012 | 1 |
| 8 | hypertonia            | 0.00 | 15 | 0.02 | 1.00 | 2006 | 4 |
| 8 | interrater            | 0.00 | 10 | 0.00 | 1.00 | 2016 | 3 |
| 8 | skeletal-muscle       | 0.00 | 9  | 0.01 | 1.00 | 2006 | 5 |
| 8 | muscle overactivity   | 0.00 | 9  | 0.00 | 1.00 | 2012 | 6 |
| 8 | care                  | 0.00 | 6  | 0.00 | 1.00 | 2014 | 3 |
| 8 | reciprocal inhibition | 0.00 | 6  | 0.00 | 1.00 | 2002 | 5 |
| 8 | health                | 0.00 | 5  | 0.00 | 1.00 | 2014 | 3 |
| 8 | type a                | 4.07 | 5  | 0.00 | 1.00 | 2015 | 2 |
| 8 | american academy      | 3.91 | 3  | 0.00 | 1.00 | 2018 | 1 |
| 7 | adductor spasticity   | 0.00 | 15 | 0.01 | 1.00 | 2008 | 7 |
| 7 | activation            | 0.00 | 14 | 0.01 | 1.00 | 2006 | 0 |
| 7 | botulinum-toxin-a     | 0.00 | 13 | 0.01 | 1.00 | 2001 | 6 |
| 7 | motor                 | 0.00 | 12 | 0.01 | 1.00 | 2015 | 3 |
| 7 | occupational therapy  | 0.00 | 10 | 1.00 | 1.00 | 2008 | 7 |
| 7 | dysport(r)            | 0.00 | 9  | 0.00 | 1.00 | 2008 | 7 |
| 7 | gait velocity         | 0.00 | 8  | 0.00 | 1.00 | 2012 | 0 |
| 7 | neuropathic pain      | 0.00 | 5  | 0.00 | 1.00 | 2012 | 6 |
| 6 | deformity             | 0.00 | 15 | 1.00 | 1.00 | 2012 | 0 |
